# Supplementary material for: Epigenetic inactivation of the MIR129-2 in hematological malignancies
Source: PubMed Central journal article supplement (PMC3576298; doi:10.1186/1756-8722-6-16), 2013-02-14
Supplement: 1756-8722-6-16-S1.pdf [file 1756-8722-6-16-S1.pdf]

MSP

Pyro

Positive control

Expected: 100%

Observed: 90.44%

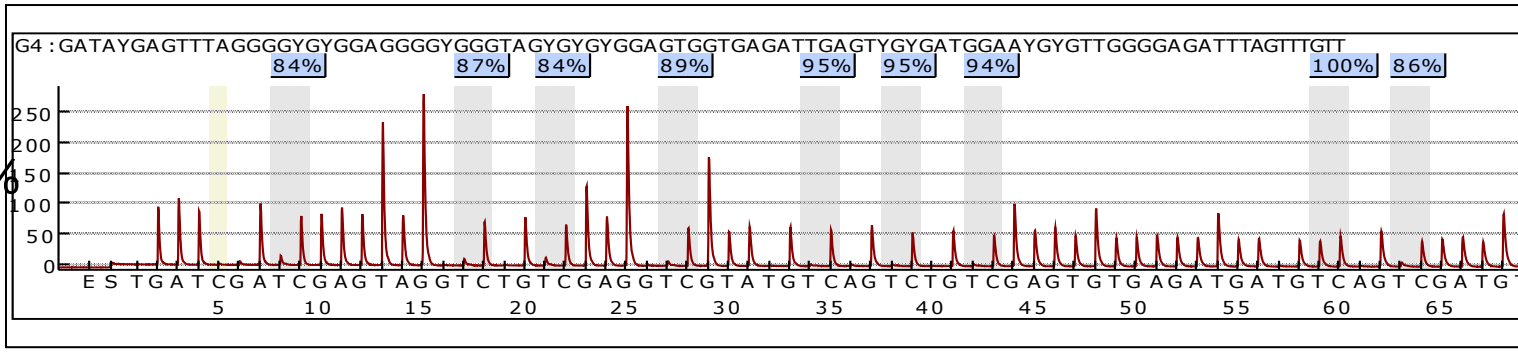

Normal control

Expected: 0%

Observed: 2.44%

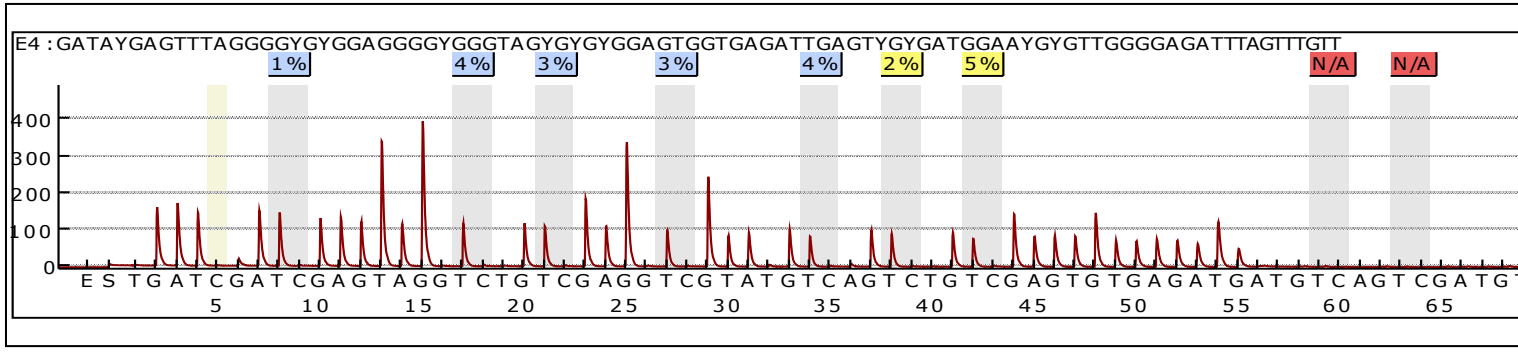

**Additional Figure 1.** Quantitative bisulfite pyrosequencing of MIR129-2. Pyrograms showing the methylation intensity on a stretch of 9 neighboring CpG dinucleotides of **(A)** Positive control with methylated DNA and normal control, and **(B)** Cell lines with defined MSP methylation statuses (MM, MU, and UU).

MSP

Pyro

MINO

MSP: MM

Pyro: 84.67%

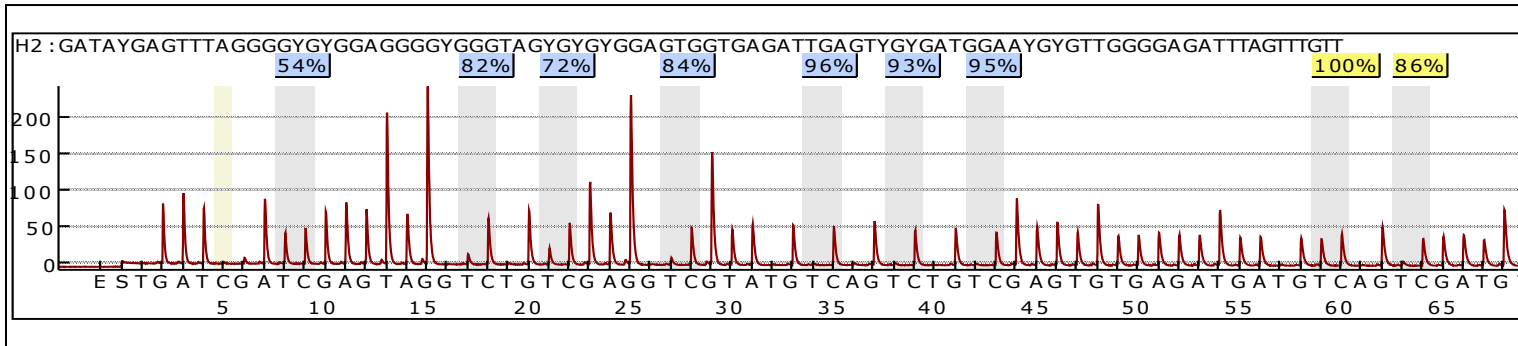

NCI-H929

MSP: MU

Pyro: 48.78%

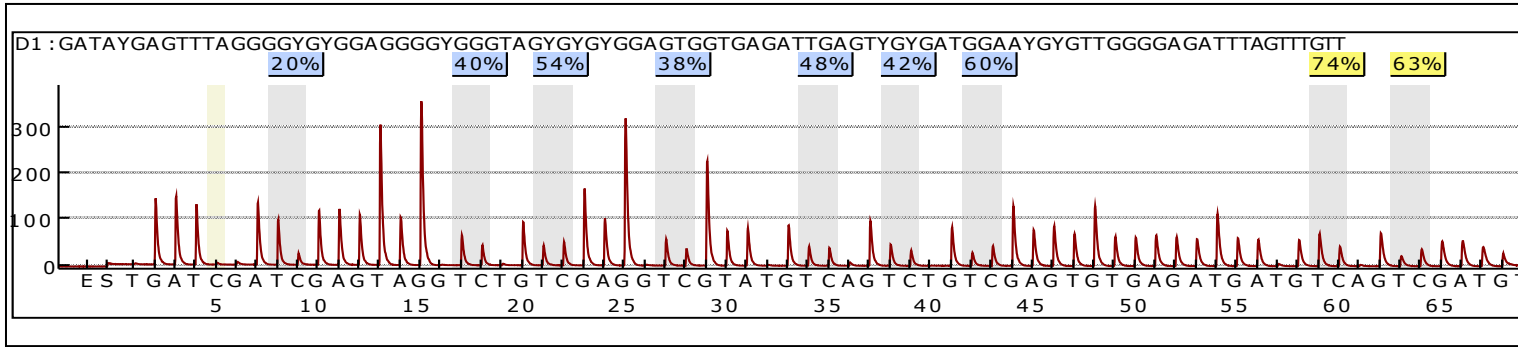

RPMI-8226

MSP: UU

Pyro: 5.33%

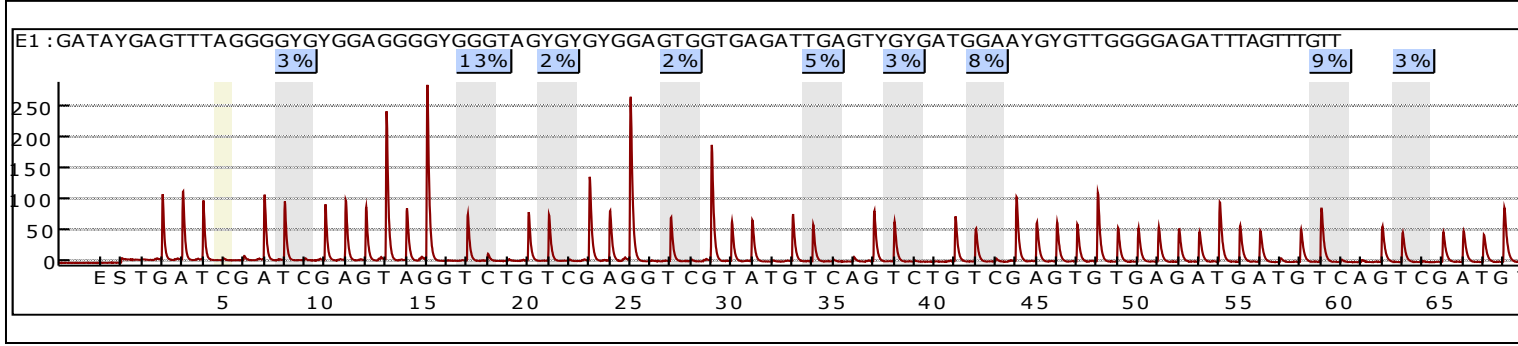

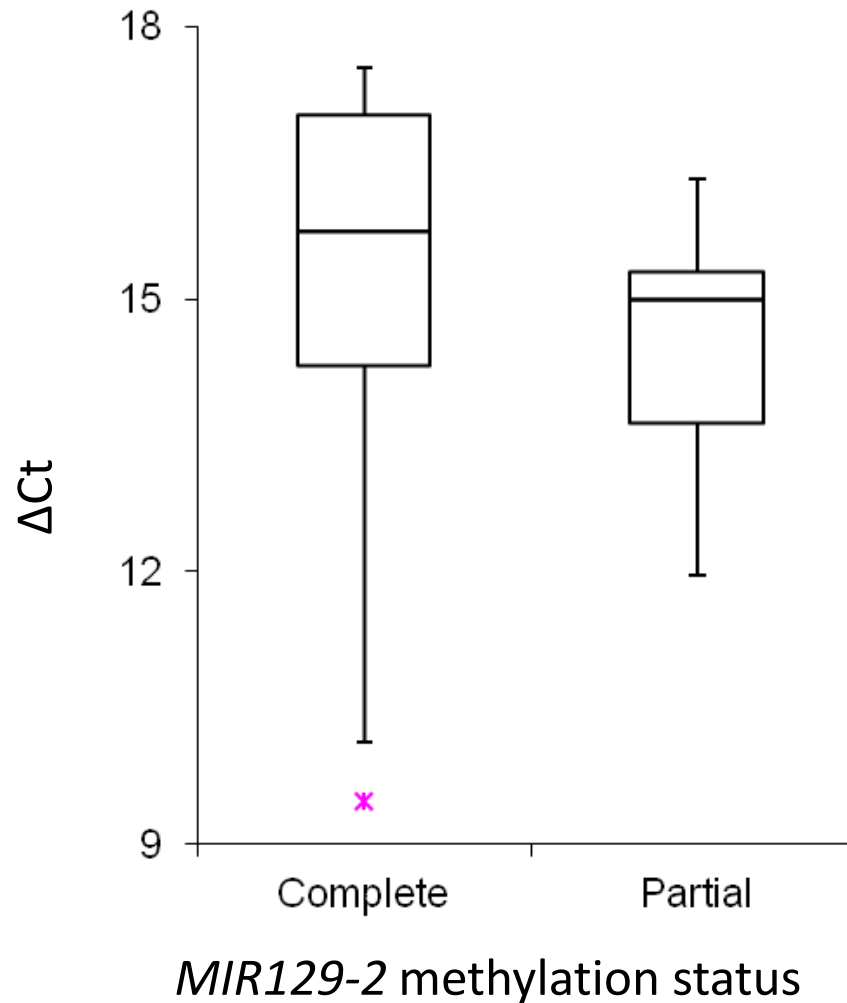

**Additional Figure 2.** Expression of MIR129 in cell lines completely or partially methylated for MIR129-2. Box-and-whisker plot showed complete methylation of MIR129-2 was associated with a lower level of MIR129 expression, and hence a higher  $\Delta Ct$  (Ct MIR129 - Ct SNORD48) than partial methylation. The box indicated the 25th and 75th percentile and the whiskers represent the range, or the 25th percentile minus 1.5 X interquartile range when skewed datum (\*) exists. The horizontal line indicated the median.

MSP

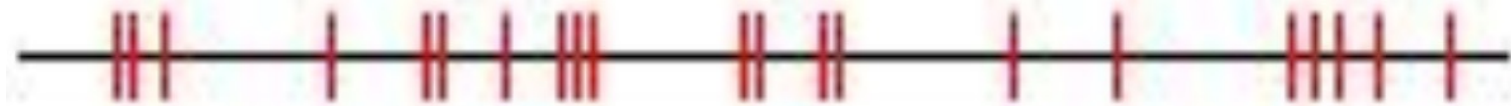

Pyro

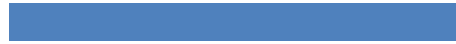

Methylated  
sample S14

MSP: MU

Pyro: 24.33%

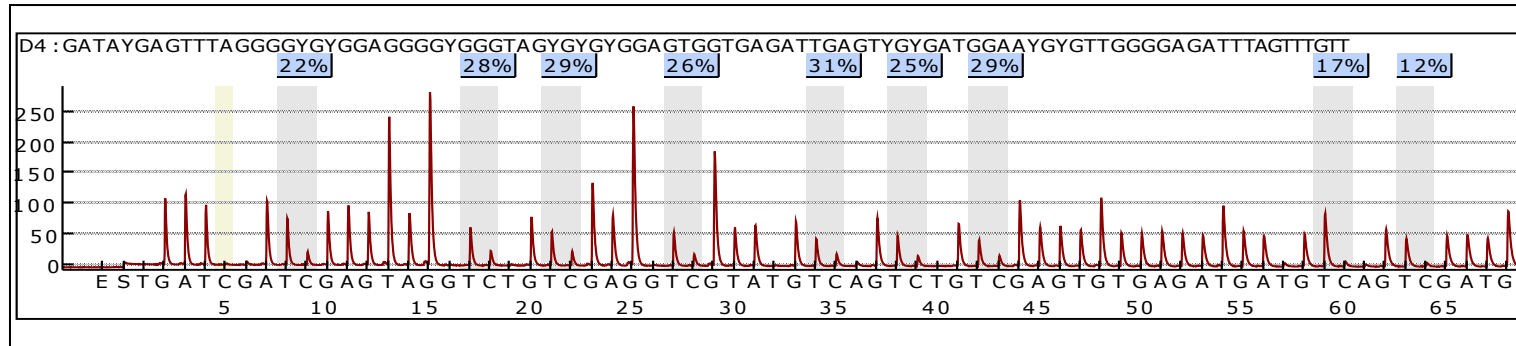

Methylated  
sample S15

MSP: MU

Pyro: 33.67%

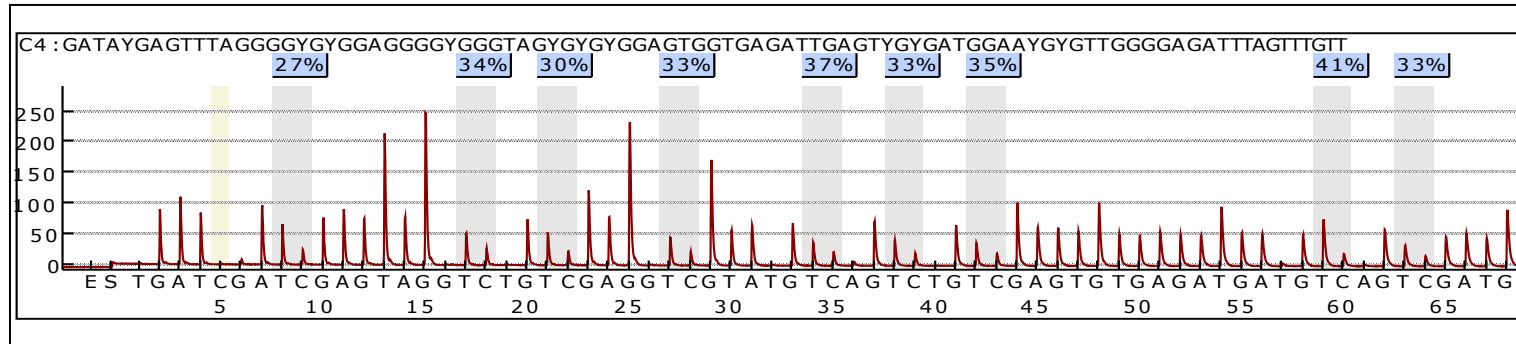

**Additional Figure 3.** Quantitative bisulfite pyrosequencing of MIR129-2. Pyrograms showing the methylation intensity on a stretch of 9 neighboring CpG dinucleotides of **(A)** methylated primary NHL samples, and **(B)** unmethylated primary NHL samples.

MSP

Pyro

Unmethylated  
sample S12

MSP: UU

Pyro: 5.78%

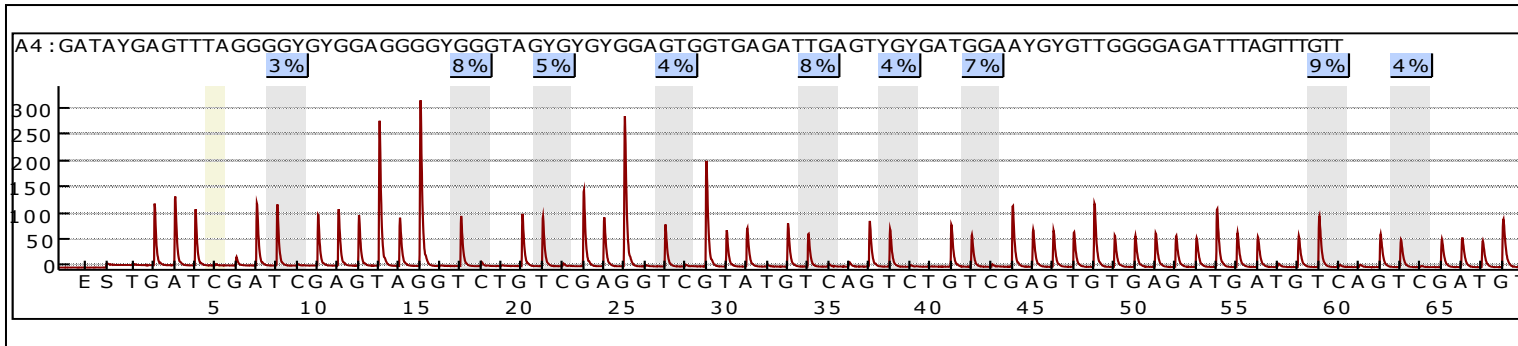

Unmethylated  
sample S13

MSP: UU

Pyro: 5.78%

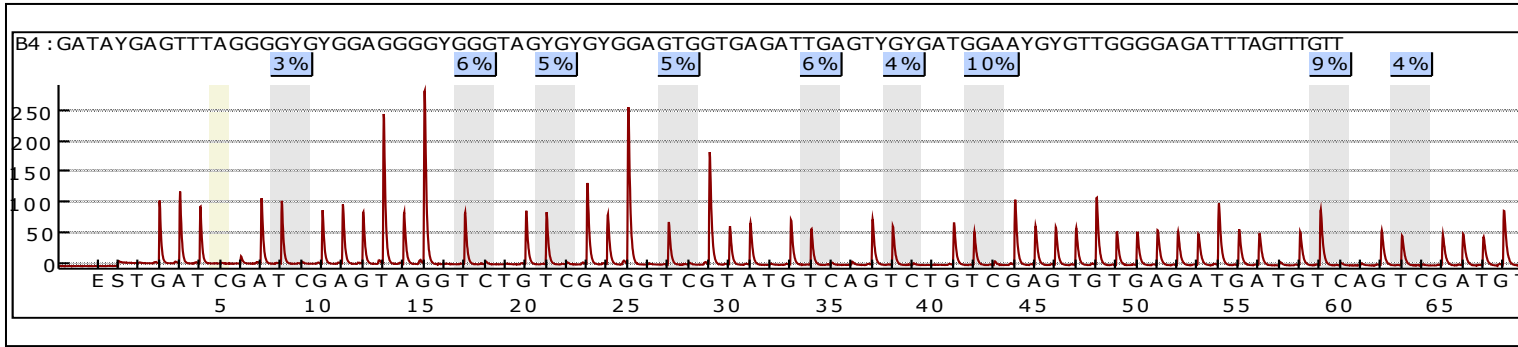

**Additional Figure 3.** Quantitative bisulfite pyrosequencing of MIR129-2. Pyrograms showing the methylation intensity on a stretch of 9 neighboring CpG dinucleotides of **(A)** methylated primary NHL samples, and **(B)** unmethylated primary NHL samples.

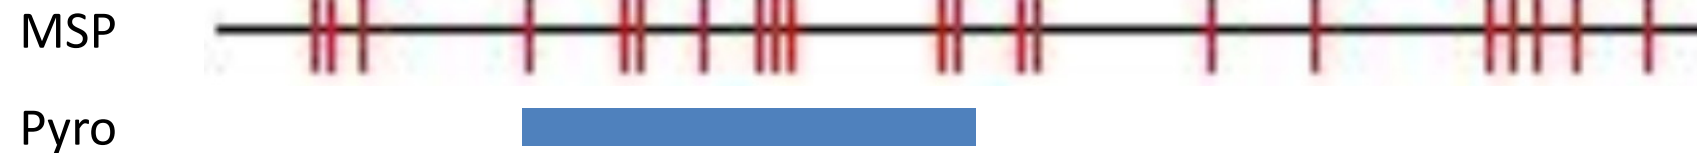

JEKO-1  
5-azadC: Untreated  
 MSP: MM  
 Pyro: 88.44%

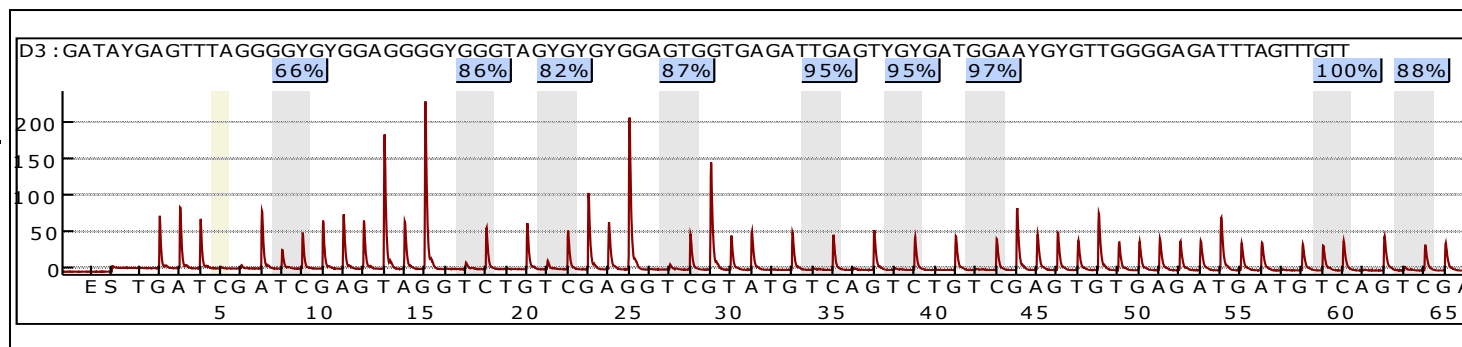

JEKO-1  
5-azadC: 0.5  $\mu$ M  
 MSP: MU  
 Pyro: 62.67%

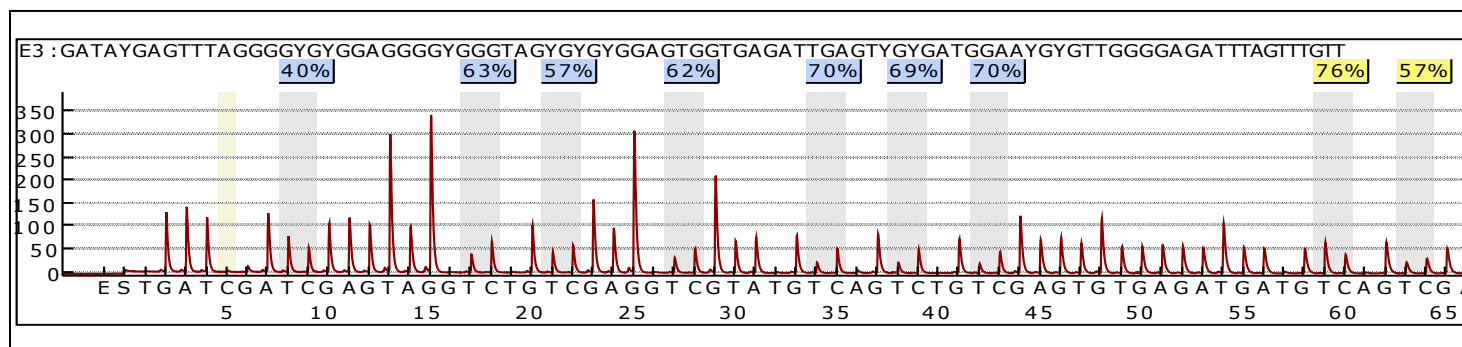

JEKO-1  
5-azadC: 1.0  $\mu$ M  
 MSP: MU  
 Pyro: 60.56%

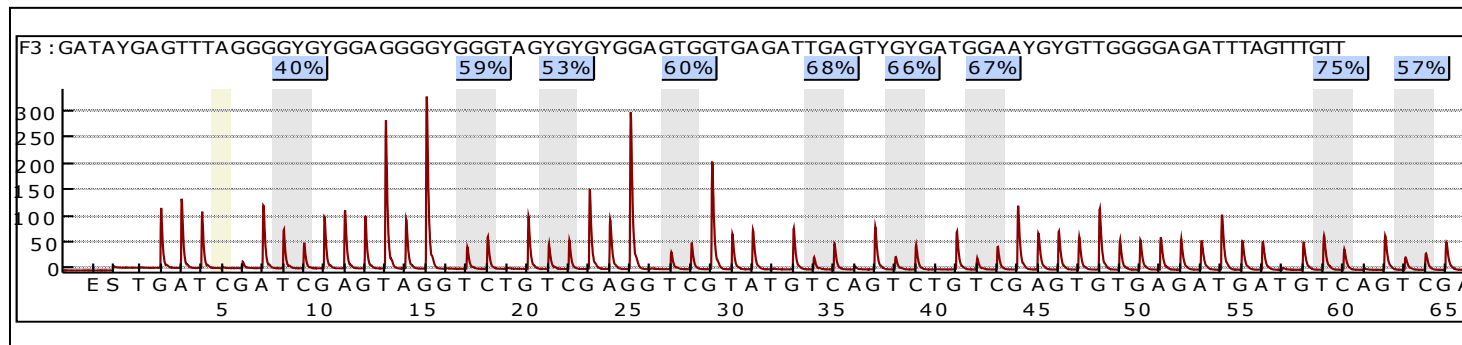

**Additional Figure 4.** Quantitative bisulfite pyrosequencing of MIR129-2. Pyrograms showing the methylation intensity on a stretch of 9 neighboring CpG dinucleotides of JEKO-1 cells before and after 5-azadC treatment.
